# Supplementary material for: Effect of Extraction Temperature on Pressurized Liquid Extraction of Bioactive Compounds from Fucus vesiculosus
Source: MDPI journal article supplement (doi:10.3390/md20040263), 2022-04-12
Supplement: s1 [file s1]

## Chromatograms for all tasted phenolic acids and standards

### Standard

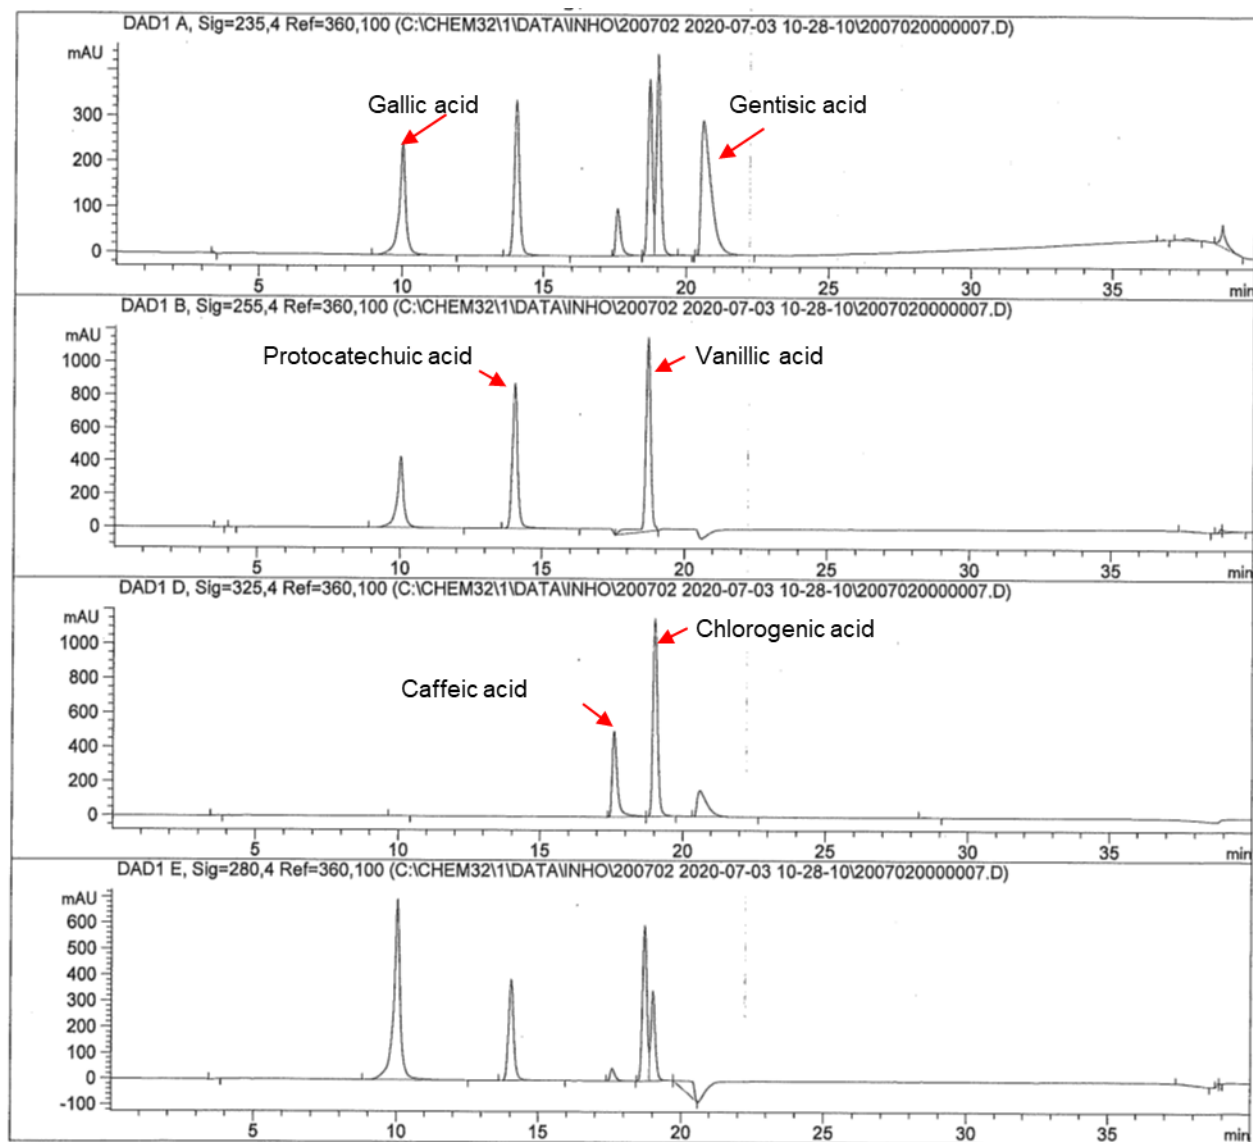

# HPLC chromatogram of phenolic acid in *F. vesiculosus* extracted at 120°C

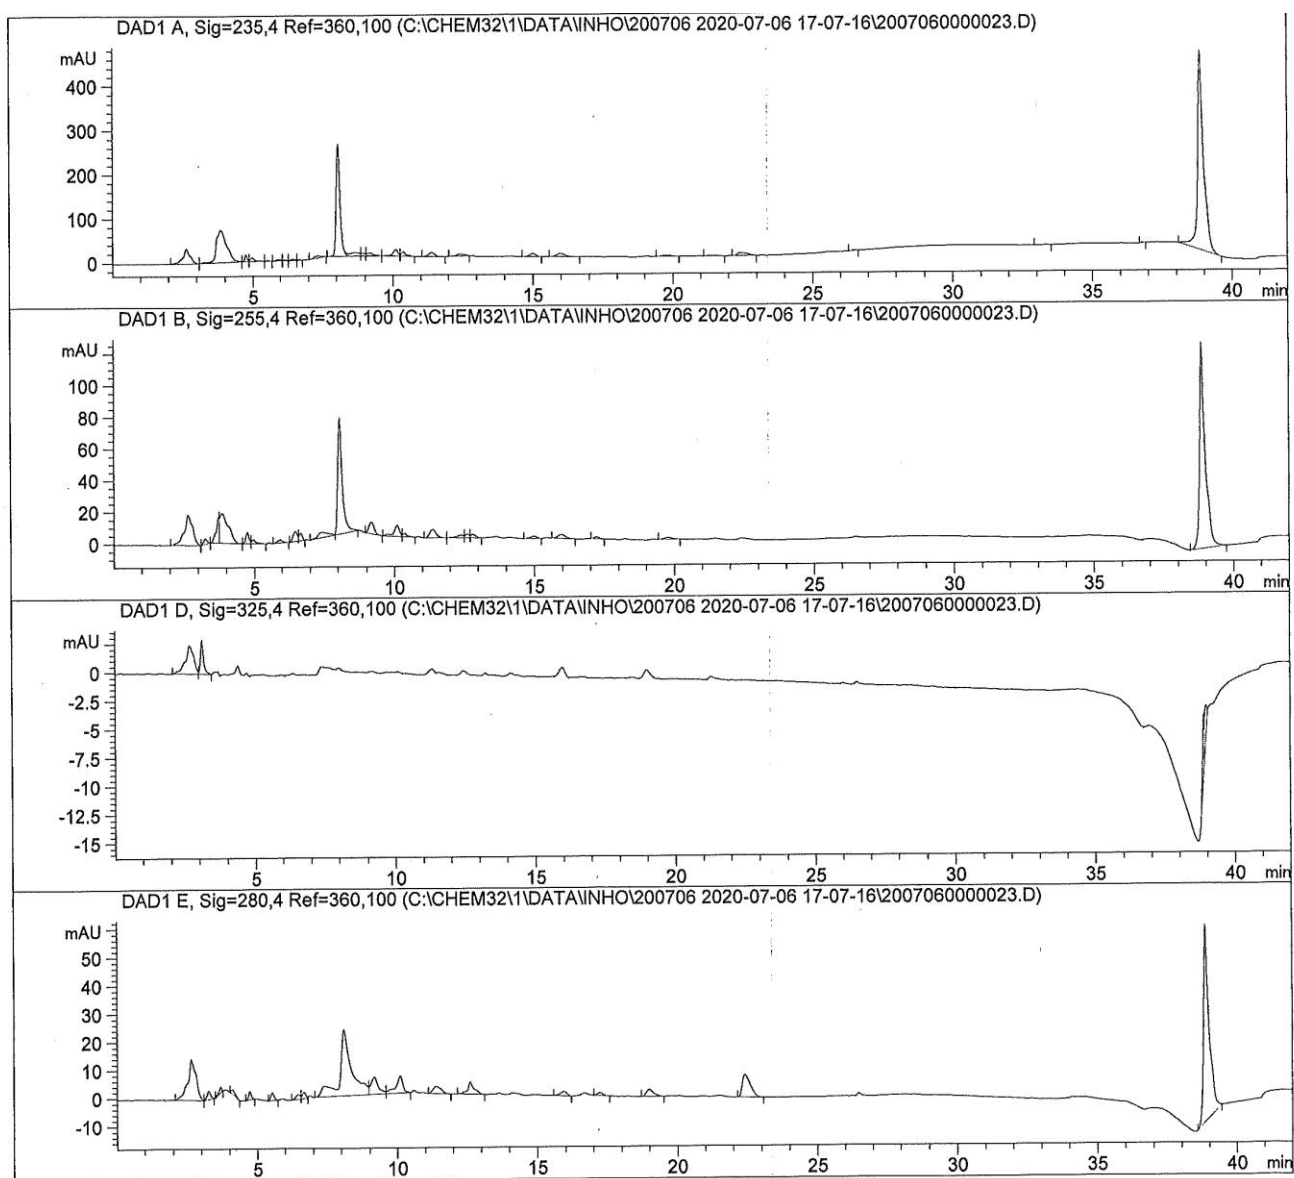

# HPLC chromatogram of phenolic acid in *F. vesiculosus* extracted 130°C

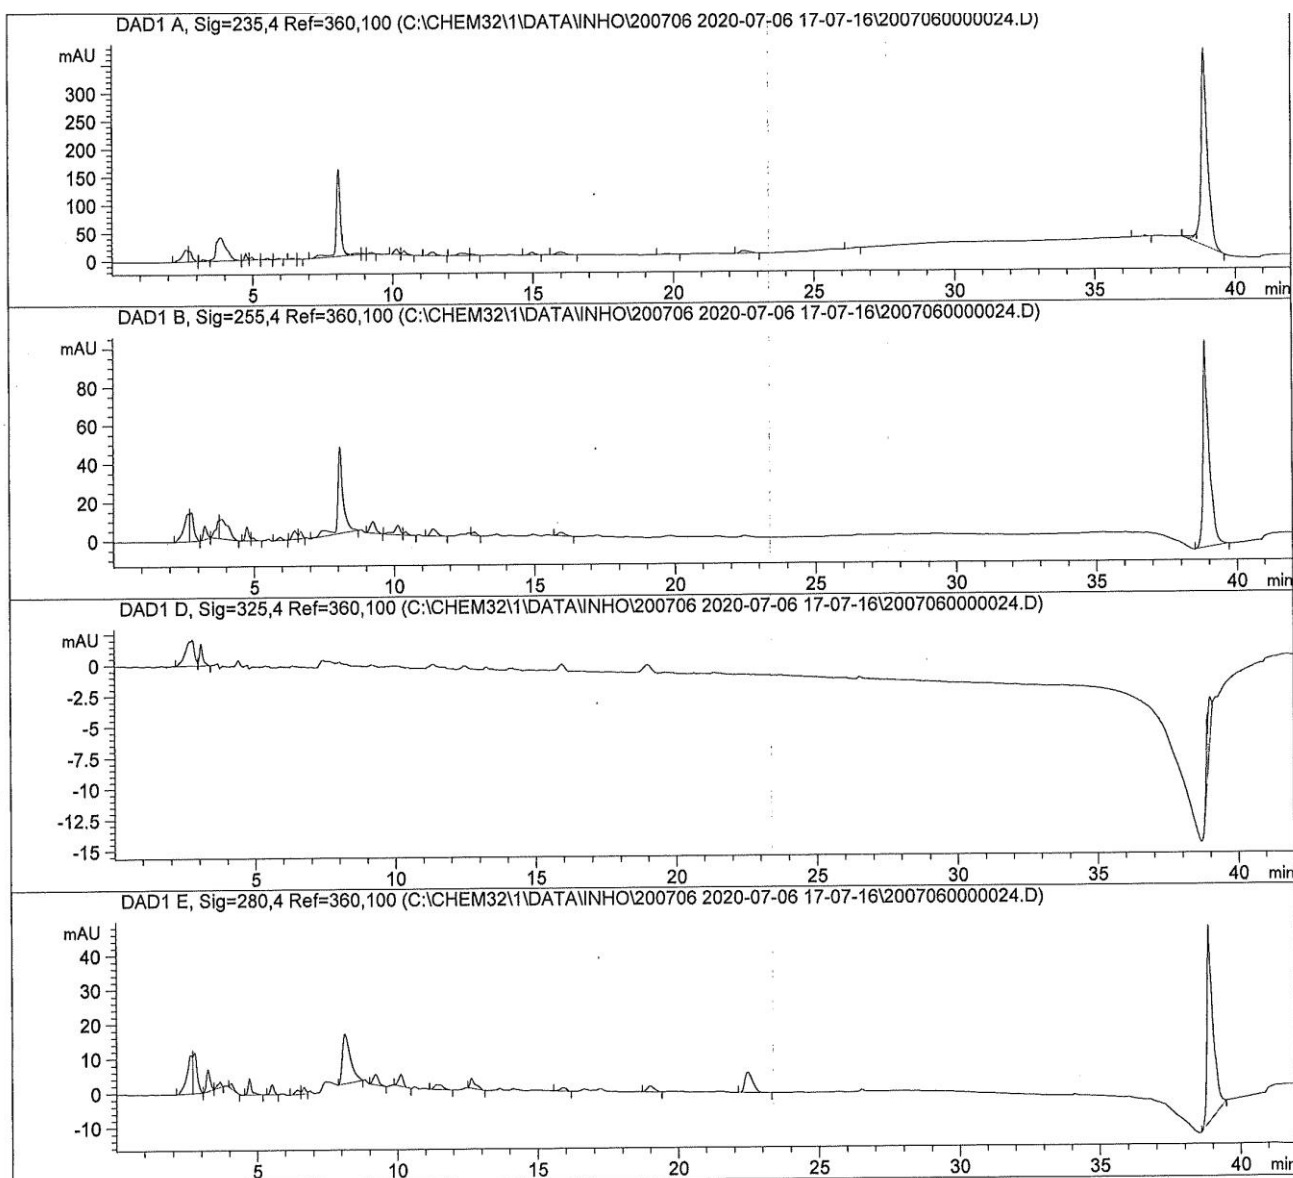

# HPLC chromatogram of phenolic acid in *F. vesiculosus* extracted 140°C

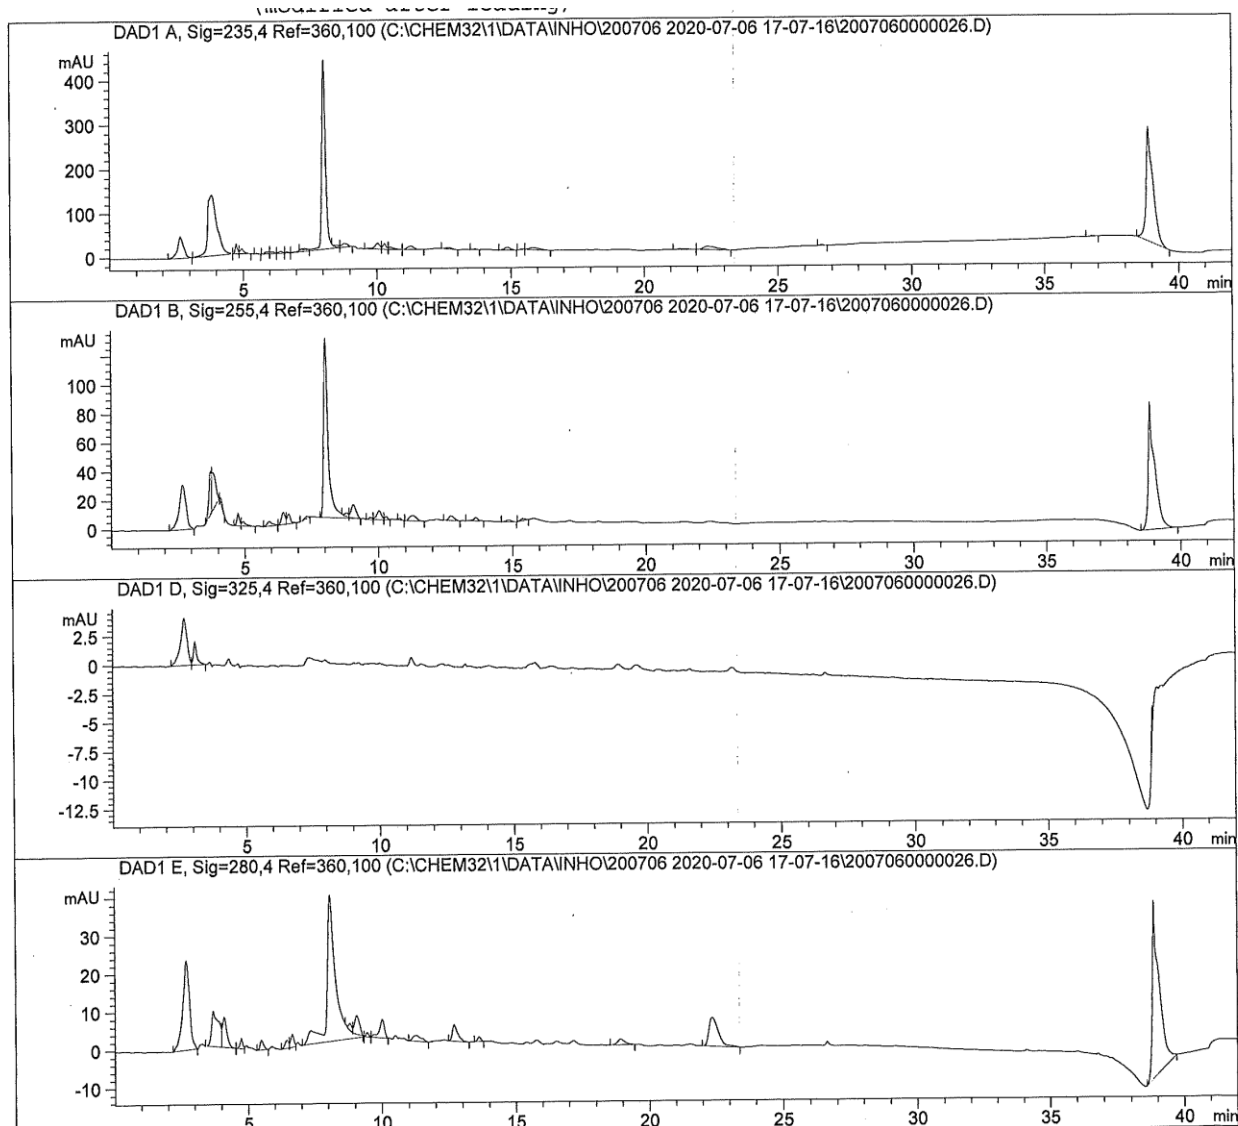

# HPLC chromatogram of phenolic acid in *F. vesiculosus* extracted 150°C

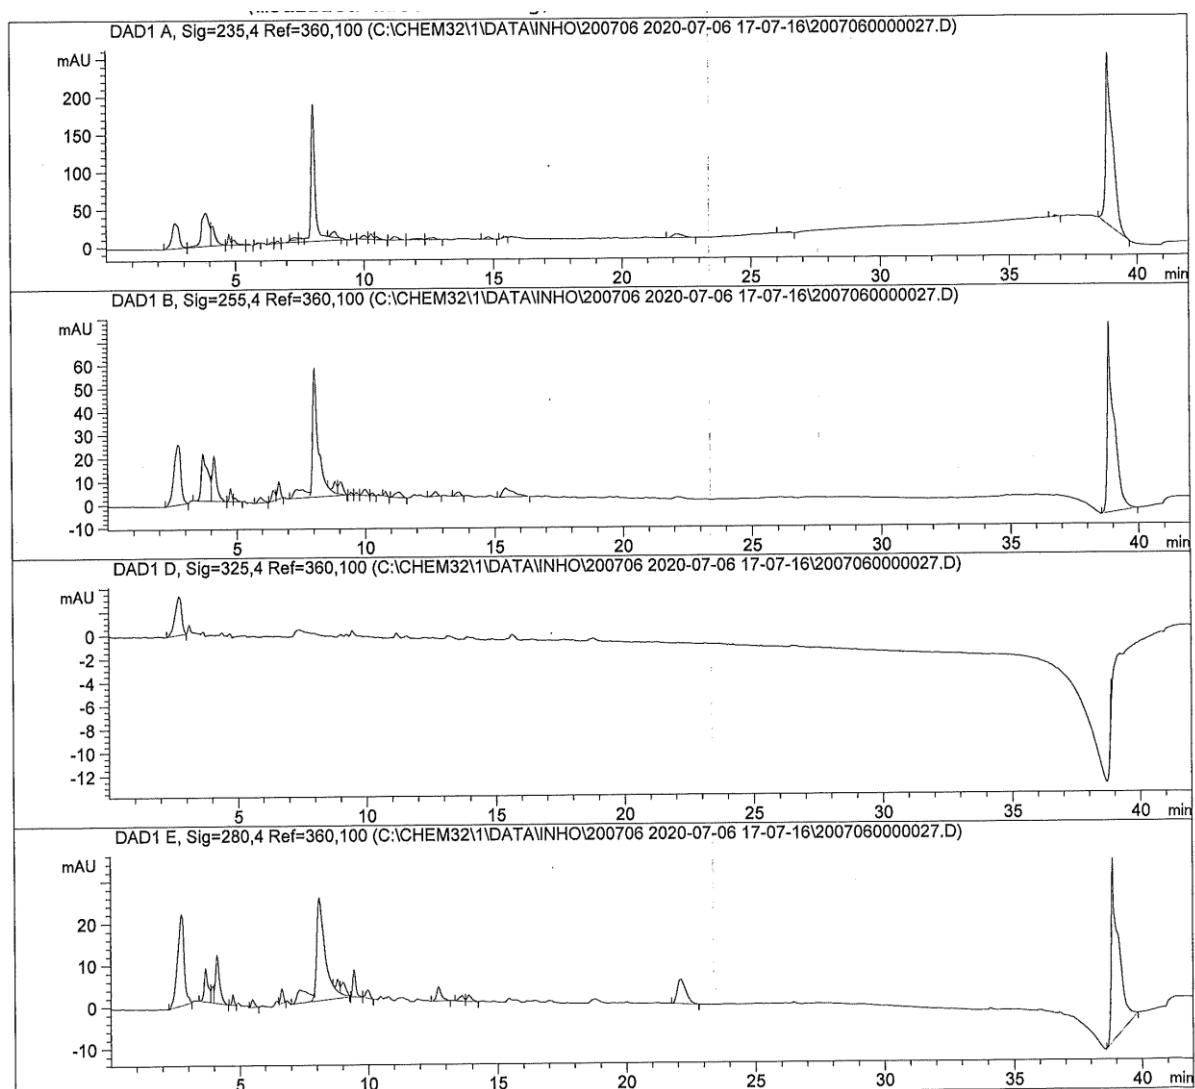

# HPLC chromatogram of phenolic acid in *F. vesiculosus* extracted 160°C

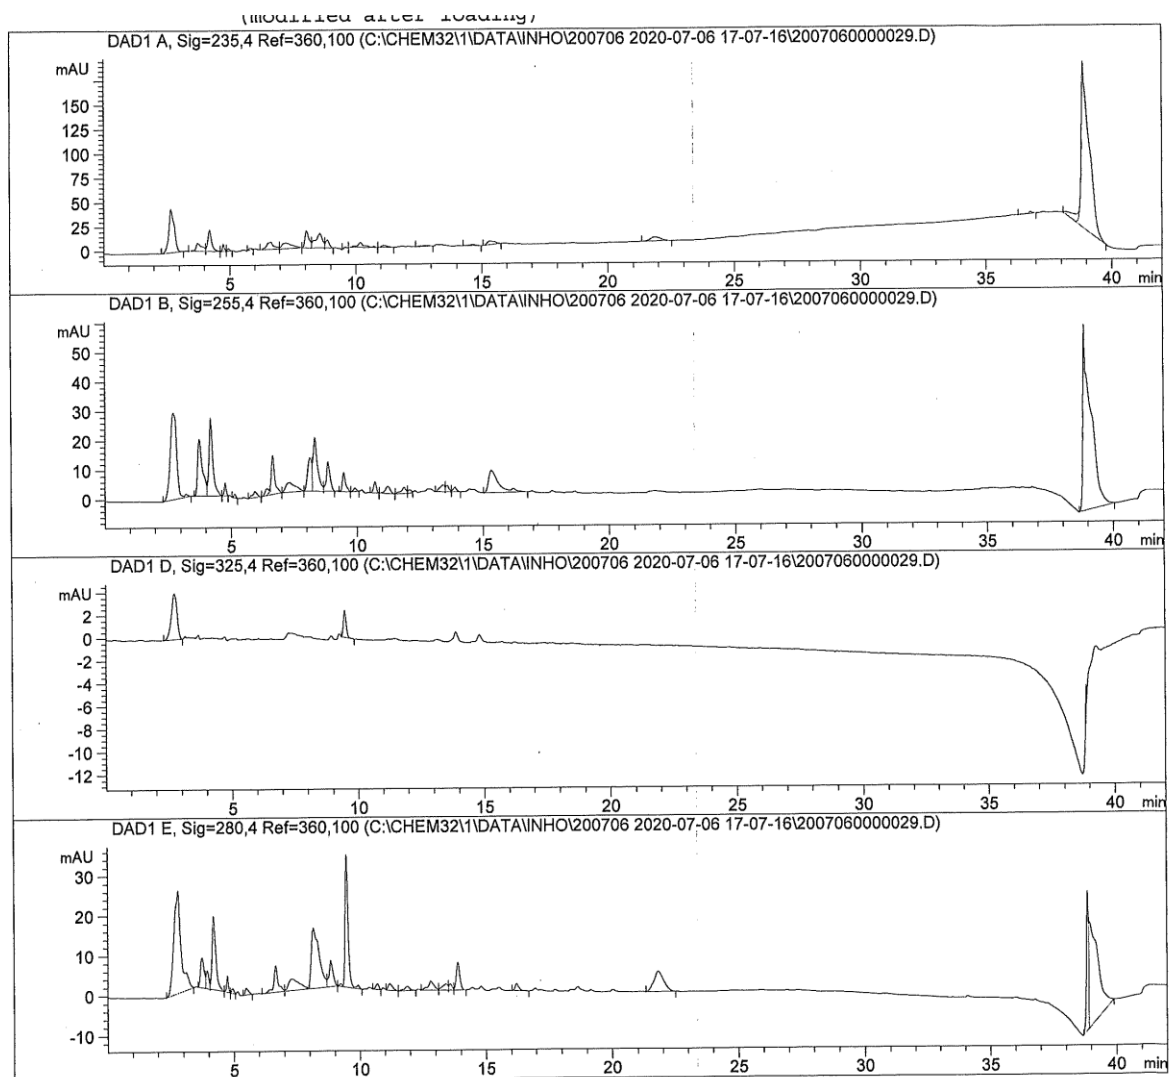

# HPLC chromatogram of phenolic acid in *F. vesiculosus* extracted 170°C

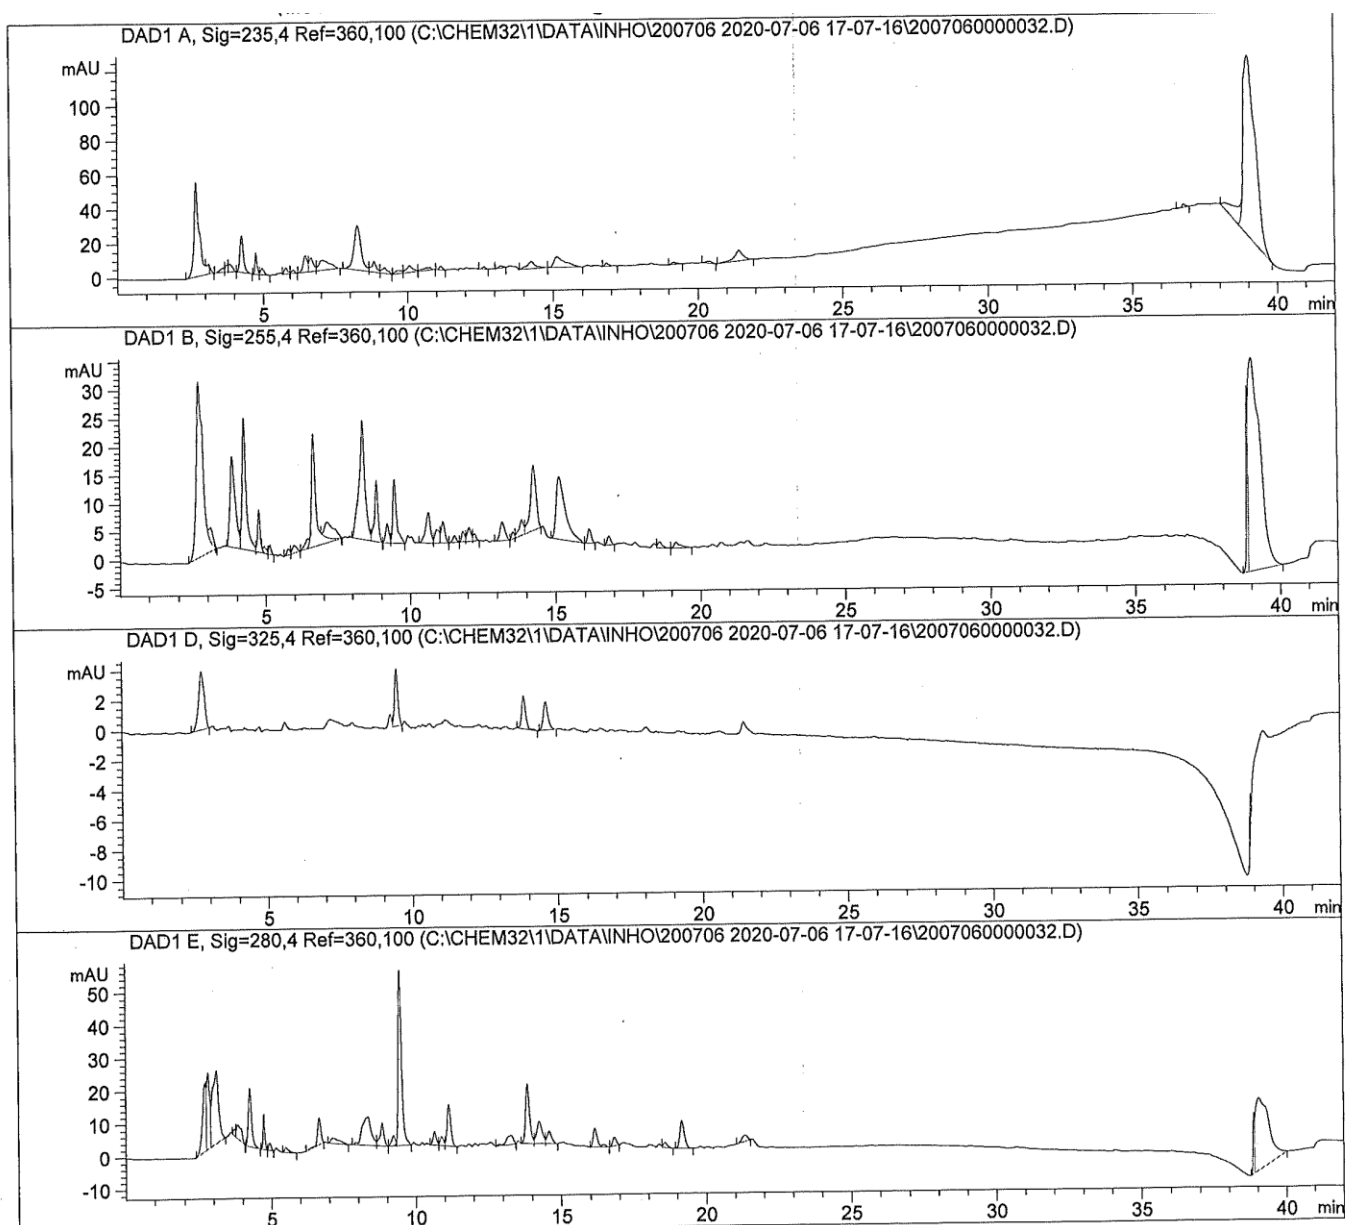

# HPLC chromatogram of phenolic acid in *F. vesiculosus* extracted 180°C

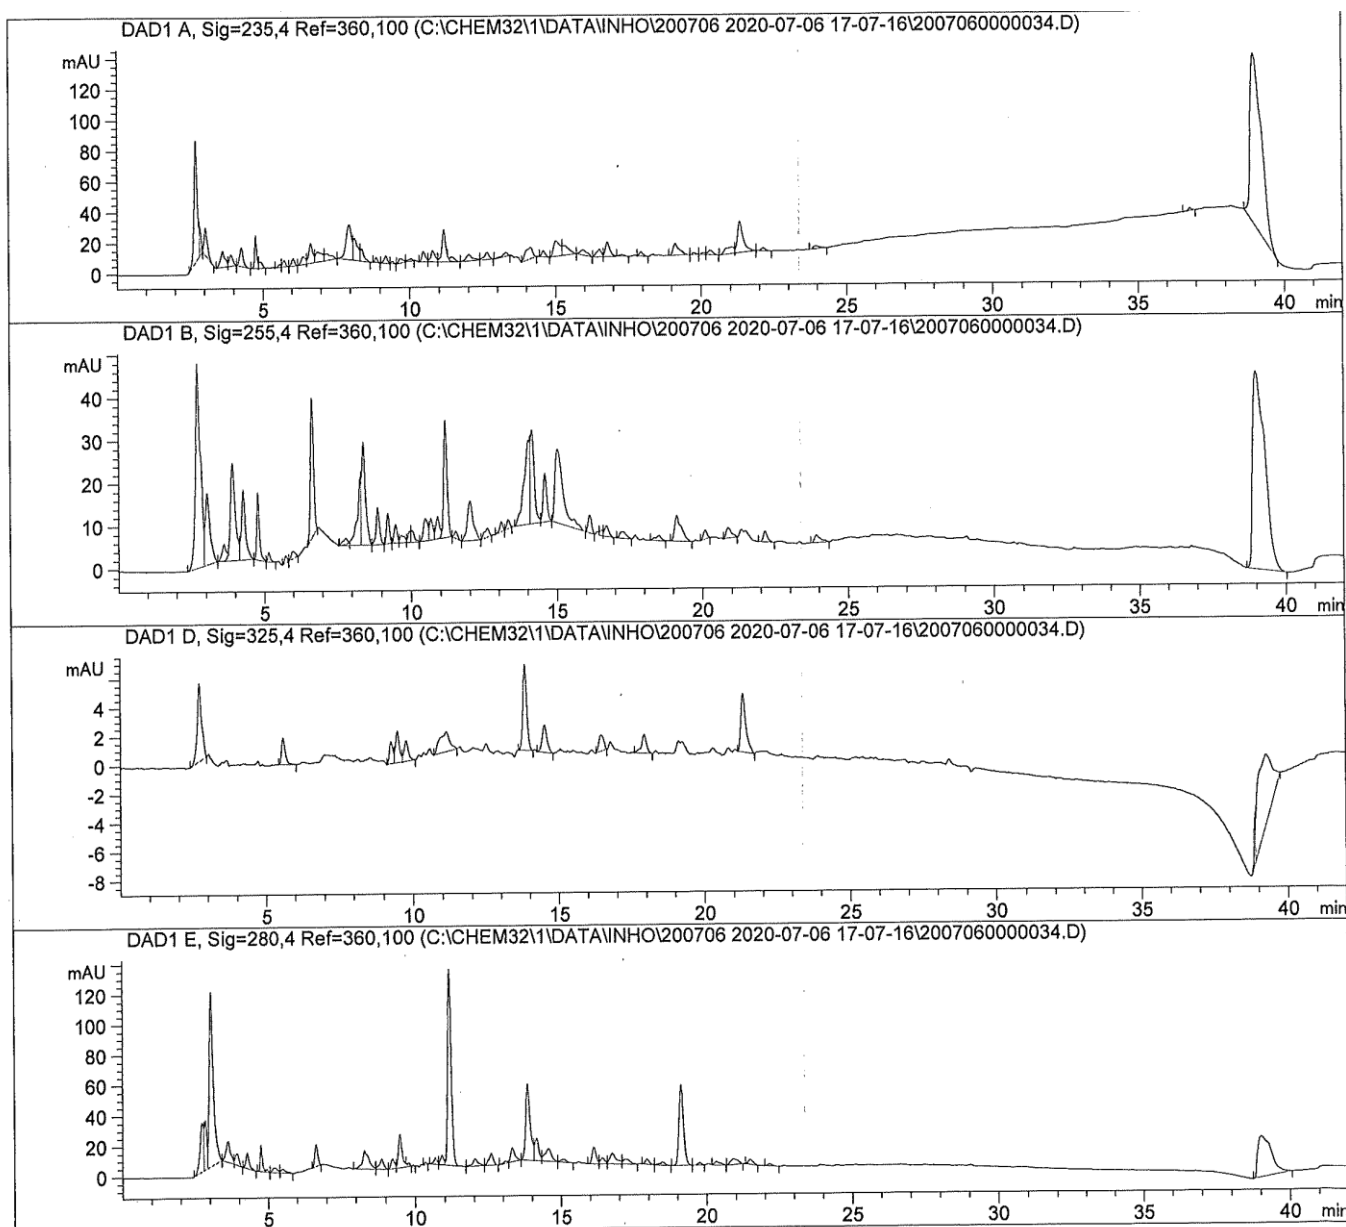



# HPLC chromatogram of phenolic acid in *F. vesiculosus* extracted 190°C

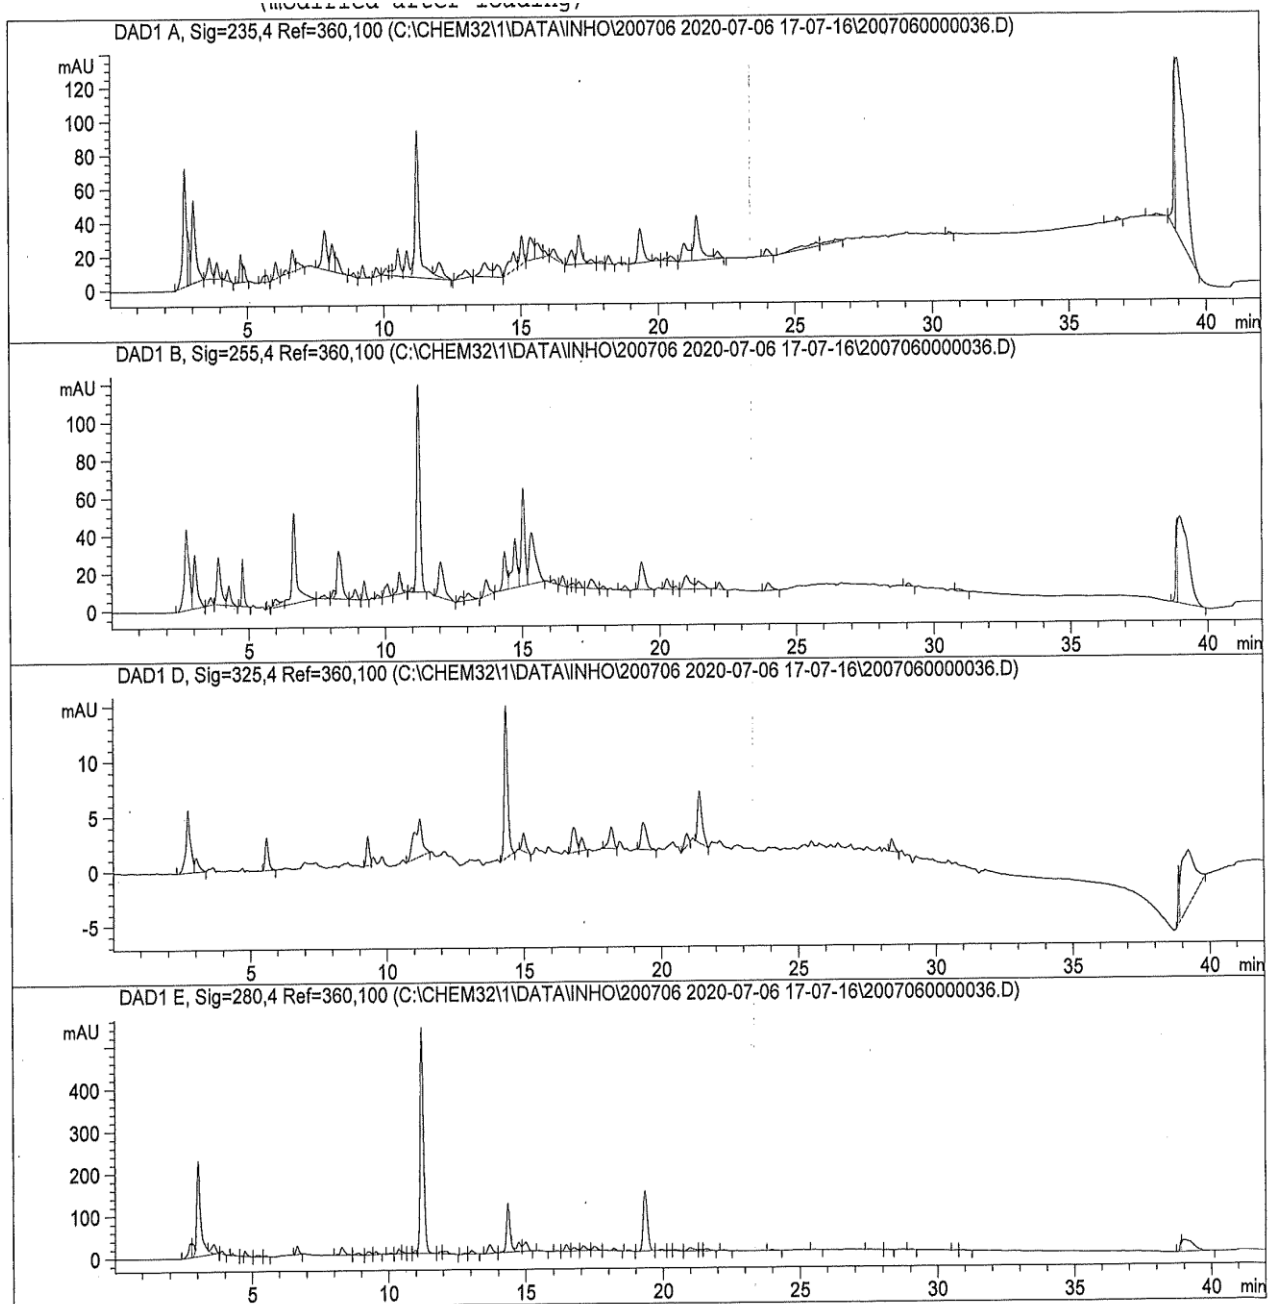

HPLC chromatogram of phenolic acid in *F. vesiculosus* extracted 200°C

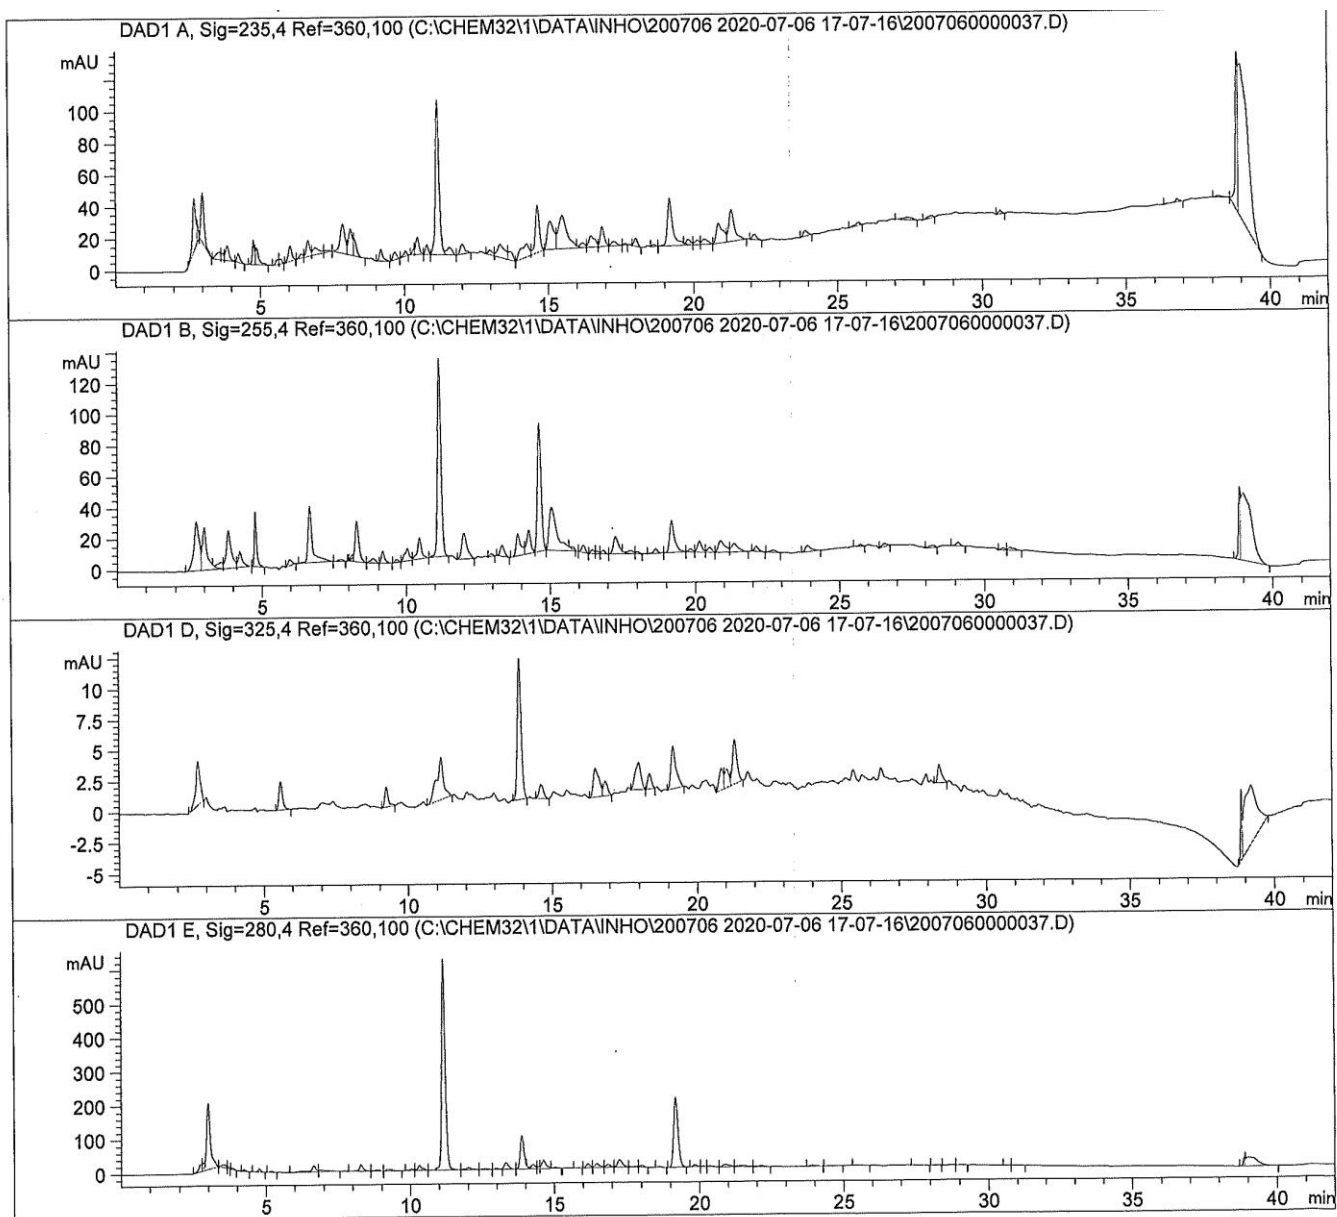

**Table S1: The R<sup>2</sup>, limit of quantification, and linearity range all tested phenolic acids.**

| <b>Compounds</b>    | <b>R<sup>2</sup></b> | <b>LOQ</b> | <b>Linearity range<br/>(µg/mg)</b> |
|---------------------|----------------------|------------|------------------------------------|
| Gallic acid         | 0.0998               | 32.81      | 5.21-166.67                        |
| Protocatechuic acid | 0.9990               | 30.18      | 5.21-166.67                        |
| Chlorogenic acid    | 0.9987               | 34.94      | 5.21-166.67                        |
| Vanillic acid       | 0.9995               | 20.96      | 5.21-166.67                        |
| Caffeic acid        | 0.9996               | 19.52      | 5.21-166.67                        |
| Gentisic acid       | 0.9979               | 43.73      | 5.21-166.67                        |
